# Supplementary material
Source: publisher figshare collection journal article supplement (https://sage.figshare.com/ndownloader/files/24074500)
Supplement: Supplementary file 1 [file 24074500]

**Appendix A: ICD-10 Codes Included in Analyses**

| <b>Diagnosis</b>                                                          | <b>ICD-10-CM</b>       |
|---------------------------------------------------------------------------|------------------------|
| <b>Abnormal Weight Gain</b>                                               | R63.XX                 |
| <b>Attention Deficit Hyperactivity Disorder</b>                           | F90.XX                 |
| <b>Asthma</b>                                                             | J45.XX                 |
| <b>BMI greater than or equal to 95<sup>th</sup> percentile for age</b>    | Z68.XX                 |
| <b>Depression</b>                                                         | F33.XX                 |
| <b>Diabetes Mellitus, Type 2</b>                                          | E11.XX                 |
| <b>Dysmetabolic Syndrome</b>                                              | E88.XX                 |
| <b>Dyslipidemia/Hyperlipidemia/Hypertriglyceridemia</b>                   | E78.XX                 |
| <b>Hypertension</b>                                                       | I10.XX                 |
| <b>Morbid Obesity</b>                                                     | E66.XX                 |
| <b>Nonalcoholic Fatty Liver Disease/Nonalcoholic Steatohepatitis</b>      | K75.XX, K76.XX         |
| <b>Obesity due to excess calories, other obesity, obesity unspecified</b> | E66.XX, E67.XX, E68.XX |
| <b>Obstructive Sleep Apnea</b>                                            | G47.XX                 |
